# Supplementary material for: Differential Placing of Flexion Creases Contributes to Sex Differences in the Second-to-Fourth Digit Ratio (2D:4D)
Source: Front Endocrinol (Lausanne). 2019 Aug 2;10:537. doi: 10.3389/fendo.2019.00537 (PMC6688535; doi:10.3389/fendo.2019.00537)
Supplement: Supplementary file 1 [file Data_Sheet_1.xlsx]

## Sheet: Sheet1
sno	sex (1=male, 2=female)	age	r2d (in cm)	r4d (in cm)	r2v (in cm)	r4v (in cm)	r2v2d	r4v4d
1	1	29	8.74	9.97	6.01	6.75	0.687643	0.677031
2	1	22	9.35	9.68	6.67	6.82	0.713369	0.704545
3	1	29	9.31	10.12	6.51	6.77	0.699248	0.668972
4	1	19	9.64	10.16	6.9	7.05	0.715768	0.693898
5	1	23	9.26	10.15	6.37	6.87	0.687905	0.676847
6	1	20	9.6	10.45	7.16	7.64	0.745833	0.7311
7	1	28	9.67	10.32	6.65	6.86	0.687694	0.664729
8	1	25	9.55	10.31	6.8	7.37	0.712042	0.71484
9	1	24	9.55	10.72	6.73	7.23	0.704712	0.67444
10	1	30	9.55	10.04	7.01	6.95	0.734031	0.692231
11	1	25	9.54	10.01	6.9	6.94	0.72327	0.693307
12	1	23	9.81	10.44	7.35	7.51	0.749235	0.719349
13	1	24	9.7	10.35	7.14	7.5	0.736082	0.724638
14	1	29	9.65	10.18	7.1	7.16	0.735751	0.70334
15	1	29	9.91	10.27	6.8	7.11	0.686176	0.692308
16	1	27	9.85	10.45	6.55	7.21	0.664975	0.689952
17	1	22	10.05	10.54	7.2	7.14	0.716418	0.677419
18	1	24	9.81	10.37	6.83	7.04	0.696228	0.678881
19	1	27	9.96	10.65	7.15	7.51	0.717871	0.705164
20	1	25	9.35	10.7	7.12	7.45	0.761497	0.696262
21	1	24	10.18	10.88	7.32	7.86	0.719057	0.722426
22	1	23	10.27	11.21	7.17	7.66	0.69815	0.683318
23	1	28	9.84	11.1	6.98	7.56	0.70935	0.681081
24	1	25	10.05	10.53	7.12	7.12	0.708458	0.676163
25	1	20	10.23	11.21	7.1	7.81	0.694037	0.696699
26	1	20	10.22	10.75	7.4	7.71	0.72407	0.717209
27	1	24	10.3	10.91	7.06	7.56	0.685437	0.692942
28	1	25	10.25	10.93	7.57	7.75	0.738537	0.709058
29	1	23	10.25	10.94	7.32	7.85	0.714146	0.71755
30	1	23	10.44	11.7	7.36	8.14	0.704981	0.695726
31	1	19	10.65	11.52	7.11	7.72	0.667606	0.670139
32	1	25	10.57	11.3	7.5	7.84	0.709555	0.693805
33	1	20	10.68	11.35	7.86	8.01	0.735955	0.705727
34	1	27	10.4	11.71	7.66	8.36	0.736538	0.71392
35	1	26	10.8	10.91	7.61	7.31	0.70463	0.670027
36	1	21	10.72	11.62	7.74	8.01	0.722015	0.689329
37	1	25	10.67	10.6	7.76	7.91	0.727273	0.746226
38	1	36	10.94	11.12	7.82	8.01	0.714808	0.720324
39	1	20	11.03	11.72	7.76	7.87	0.703536	0.671502
40	1	25	11.61	12.4	8.12	8.44	0.699397	0.680645
41	1	31	11.4	11.56	7.82	8.23	0.685965	0.711938
42	2	18	8.4	8.95	6.04	6.14	0.719048	0.686034
43	2	19	8.75	9.21	6.41	6.42	0.732571	0.697068
44	2	17	8.65	9.16	6.01	6.44	0.694798	0.703057
45	2	18	8.44	9.28	6.01	6.31	0.712085	0.679957
46	2	23	8.67	9.1	6.23	6.35	0.71857	0.697802
47	2	22	8.8	9.25	6.33	6.2	0.719318	0.67027
48	2	18	8.6	9.2	6.36	6.6	0.739535	0.717391
49	2	22	8.56	9.4	6.54	6.65	0.764019	0.707447
50	2	21	8.82	9.44	6.34	6.34	0.718821	0.67161
51	2	16	8.85	9.85	6.51	6.6	0.735593	0.670051
52	2	16	8.96	9.56	6.74	6.65	0.752232	0.695607
53	2	21	9	9.7	6.15	6.34	0.683333	0.653608
54	2	20	9.04	9.7	6.43	6.56	0.711283	0.676289
55	2	27	8.78	9.53	6.18	6.28	0.703872	0.658972
56	2	23	8.93	9.93	6.67	7.1	0.74692	0.715005
57	2	20	8.46	9.9	6.1	6.96	0.72104	0.70303
58	2	21	9.1	10.17	6.71	7.24	0.737363	0.711898
59	2	23	9.13	9.66	6.73	6.9	0.73713	0.714286
60	2	17	9.04	10	6.56	7.04	0.725664	0.704
61	2	23	9.21	9.81	6.75	6.86	0.732899	0.699286
62	2	24	9.36	10.16	7	7.9	0.747863	0.777559
63	2	18	9.15	10.1	7.07	7.28	0.772678	0.720792
64	2	22	9.07	10.14	6.61	7.05	0.728776	0.695266
65	2	29	9.08	9.65	6.45	6.84	0.710352	0.708808
66	2	23	9.28	9.8	6.7	6.76	0.721983	0.689796
67	2	18	9.3	9.75	6.45	6.67	0.693548	0.684103
68	2	19	9.56	10.12	6.74	6.54	0.705021	0.646245
69	2	22	9.44	10.15	7.23	7.54	0.76589	0.742857
70	2	18	9.44	10.27	6.75	6.78	0.715042	0.660175
71	2	25	9.47	10	6.79	7.04	0.717001	0.704
72	2	18	9.55	10.34	7.15	7.35	0.748691	0.710832
73	2	23	9.5	10.2	7.96	7.26	0.837895	0.711765
74	2	16	9.02	10.02	6.51	6.96	0.721729	0.694611
75	2	26	9.06	9.42	6.9	6.96	0.761589	0.738854
76	2	18	9.34	10.05	6.95	7.27	0.744111	0.723383
77	2	21	9.77	10.41	7.07	7.17	0.723644	0.688761
78	2	19	9.51	10.66	6.86	7.46	0.721346	0.699812
79	2	27	9.81	10.42	7.22	7.37	0.735984	0.707294
80	2	19	9.91	10.5	7.18	7.13	0.724521	0.679048
81	2	19	9.82	10.31	6.97	7.24	0.709776	0.702231
82	2	27	10	10.5	7.46	7.36	0.746	0.700952
83	2	17	9.83	10.9	7.1	7.7	0.722279	0.706422
84	2	19	9.85	10.71	7.07	7.52	0.717766	0.702148
85	2	20	9.483	10.244	6.99	7.232	0.737109	0.705974
86	2	21	8.969	9.633	6.715	7.392	0.74869	0.767362
87	2	20	8.498	9.183	6.07	6.446	0.714286	0.701949
88	2	21	9.567	10.14	7.125	7.32	0.744748	0.721893
89	2	21	9.897	10.674	7.372	7.433	0.744872	0.696365
90	2	19	10.295	10.752	7.772	7.726	0.75493	0.718564
91	2	18	9.009	9.594	6.299	6.727	0.69919	0.701167
92	1	42	9.522	10.026	6.938	6.865	0.728628	0.68472
93	1	35	10.983	11.567	7.807	8.099	0.710826	0.700182
94	1	38	10.201	11.015	6.861	7.308	0.672581	0.663459
95	1	44	10.002	10.935	6.838	7.252	0.683663	0.663192
96	1	48	10.956	11.438	7.401	7.939	0.67552	0.69409
97	1	18	10.759	11.285	7.821	8.054	0.726926	0.713691
98	1	17	10.105	10.552	7.12	7.8	0.704602	0.739196
99	1	17	9.907	11.187	7.375	7.947	0.744423	0.710378
100	1	17	10.505	11.047	7.732	7.949	0.73603	0.719562
