# Supplementary material for: Differential Placing of Flexion Creases Contributes to Sex Differences in the Second-to-Fourth Digit Ratio (2D:4D)
Source: Front Endocrinol (Lausanne). 2019 Aug 2;10:537. doi: 10.3389/fendo.2019.00537 (PMC6688535; doi:10.3389/fendo.2019.00537)
Supplement: Supplementary file 2 [file Data_Sheet_2.xlsx]

## Sheet: Sheet1
sno	age	sex (1=male, 2=female)	R2D_HT (in mm)	R2D_HA (in mm)	R2V_HT (in mm)	R4D_HT (in mm)	R4D_HA (in mm)	R4V_HT (in mm)	HT_2V2Dratio	HA_2V2Dratio	HT_4V4Dratio	HA_4V4Dratio
1	20	2	95.05	97.47	67.1	100.44	100.19	69.69	0.705944	0.688417	0.693847	0.695578
2	18	2	91.1	90.5	60.6	96.39	97	64.98	0.665203	0.669613	0.674136	0.669897
3	17	2	91.86	91.71	66.56	96.77	95.4	68.68	0.724581	0.725766	0.709724	0.719916
4	16	2	92.48	92.19	67.7	97.43	99.3	68.08	0.73205	0.734353	0.698758	0.685599
5	18	2	95.34	95.26	69.13	97.35	96.92	68.23	0.725089	0.725698	0.700873	0.703983
6	18	2	91	93.04	70.22	95.75	95.5	66.9	0.771648	0.754729	0.698695	0.700524
7	16	2	85.2	82.72	59.54	90.13	88.03	60.97	0.698826	0.719778	0.676467	0.692605
8	17	2	93.58	92.77	67.93	98.99	98.82	68.47	0.725903	0.732241	0.691686	0.692876
9	16	2	97.49	100.12	70.42	105.35	106.18	69.69	0.72233	0.703356	0.661509	0.656338
10	16	2	90.39	89.96	64.5	99.29	99.44	69.13	0.713575	0.716985	0.696243	0.695193
11	17	2	94.92	95.53	67.53	100.71	101.23	69.11	0.711441	0.706898	0.686228	0.682703
12	17	2	92.88	92.8	68.34	95.05	96.54	68.01	0.735788	0.736422	0.715518	0.704475
13	18	2	94.24	95.08	64.11	104.32	103.79	70.8	0.680284	0.674274	0.678681	0.682147
14	21	2	93.95	93.44	68.23	100.66	101.12	70.41	0.726237	0.730201	0.699483	0.696301
15	16	2	84.69	84.88	60.14	89.42	90.59	61.23	0.710119	0.70853	0.684746	0.675902
16	17	2	89.96	91.68	65.95	98.89	99.93	71.24	0.733104	0.71935	0.720396	0.712899
17	16	2	93.29	93.92	67.37	98.14	98.92	66.95	0.722157	0.717313	0.682189	0.67681
18	17	2	91.46	92.01	67.56	96.65	97.32	66.39	0.738684	0.734268	0.686912	0.682182
19	17	2	98.23	98.2	72.28	104.51	103.79	73.09	0.735824	0.736049	0.699359	0.70421
20	18	2	88.75	88.83	65.83	94.4	94.73	65.54	0.741746	0.741078	0.69428	0.691861
21	19	2	95.56	96.93	71.04	104.98	104.08	76.04	0.743407	0.7329	0.724328	0.730592
22	17	2	81.27	81.75	57.87	87.79	87.16	60	0.712071	0.70789	0.683449	0.688389
23	17	2	90.25	89.23	60.04	95.95	97.3	64	0.665263	0.672868	0.667014	0.65776
24	17	2	93.89	94.68	65.58	99.65	100.58	69.45	0.698477	0.692649	0.696939	0.690495
25	18	2	95.28	95.6	69.33	97.29	95	69.33	0.727645	0.725209	0.712612	0.729789
26	18	2	97.43	98.31	71.82	106.3	107.5	76.26	0.737145	0.730546	0.717404	0.709395
27	17	2	90.87	91.51	64.64	94.99	95.58	66.97	0.711346	0.706371	0.705022	0.70067
28	17	2	92.56	92.87	60.93	99.02	98.7	65.81	0.658276	0.656078	0.664613	0.666768
29	17	2	87.22	88.27	64.39	92.69	94.47	65.54	0.738248	0.729466	0.707088	0.693765
30	18	2	87.85	88.86	63.84	91.64	92.29	62.93	0.726693	0.718433	0.686709	0.681872
31	17	2	89.61	89.93	63.07	97.74	96.48	66.81	0.703828	0.701323	0.683548	0.692475
32	17	2	91	92.39	65.63	95.63	95.82	67.02	0.721209	0.710358	0.700826	0.699436
33	18	2	88.83	88.92	62.49	99.18	97.54	68.5	0.703479	0.702767	0.690663	0.702276
34	18	2	94.06	94.73	66.3	101.66	100.68	69.01	0.704869	0.699884	0.678831	0.685439
35	19	2	91.34	91.83	62.7	100.3	98.84	66.55	0.686446	0.682783	0.663509	0.67331
36	17	1	100.65	101.36	72.28	110.4	110.85	79.02	0.718132	0.713102	0.715761	0.712855
37	17	1	99.06	97.42	65.39	111.61	111.08	72.09	0.660105	0.671217	0.64591	0.648992
38	18	1	102.48	102.41	70.23	108.81	107.74	74.14	0.685304	0.685773	0.681371	0.688138
39	18	1	91.8	92.27	64.28	98.33	99.44	67.34	0.700218	0.696651	0.684837	0.677192
40	18	1	99.01	98.77	68.68	103.22	102.7	72.96	0.693667	0.695353	0.70684	0.710419
41	20	1	97.11	97.57	69.52	103.33	104.97	72.21	0.715889	0.712514	0.698829	0.687911
42	16	1	96.95	98	67.87	103.2	104.17	69.35	0.700052	0.692551	0.671996	0.665739
43	16	1	102.81	103.61	72.77	108.53	106.95	77.46	0.707811	0.702345	0.71372	0.724264
44	17	1	101.71	103.11	69.87	109.9	109.66	73.3	0.686953	0.677626	0.66697	0.66843
45	21	1	98.04	99.23	70.61	104.94	107.22	71.22	0.720216	0.711579	0.678674	0.664242
46	18	1	92.32	92.46	63.96	99.36	99.37	67.2	0.692808	0.691759	0.676329	0.67626
47	18	1	92.02	91.98	61.71	98.26	98.81	62.58	0.670615	0.670907	0.636882	0.633337
48	17	1	106.99	106.71	79.6	113.65	113.79	78.01	0.743995	0.745947	0.686406	0.685561
49	16	1	94.35	93.34	66.56	98.45	98.72	68.9	0.705458	0.713092	0.699848	0.697934
50	17	1	104.57	105.62	76.34	111.24	112.57	75.8	0.730037	0.72278	0.68141	0.673359
51	16	1	101.34	101.6	70.45	106.91	108	75.75	0.695185	0.693406	0.70854	0.701389
52	17	1	98.77	97.9	70.15	104.18	104.09	75.83	0.710236	0.716547	0.727875	0.728504
53	18	1	99.14	99.97	69.27	105	105.27	71	0.698709	0.692908	0.67619	0.674456
54	18	1	100.25	101.25	71.52	105.71	107.93	74.49	0.713416	0.70637	0.704664	0.69017
55	18	1	95	95.57	65.82	100.13	102.3	71.48	0.692842	0.68871	0.713872	0.698729
56	17	1	98.5	98.75	66.05	103.01	102.68	64.11	0.670558	0.668861	0.622367	0.624367
57	18	1	98.86	97.47	64.85	103.7	103.58	70.24	0.655978	0.665333	0.677338	0.678123
58	16	1	96.48	98.35	69.46	104.32	104.37	70.34	0.719942	0.706253	0.674271	0.673948
59	16	1	91.83	93.25	63.07	97.22	97.66	64.99	0.686813	0.676354	0.668484	0.665472
60	18	1	89.33	90.25	63.71	95.52	97.42	66.79	0.713198	0.705928	0.699225	0.685588
61	16	1	100.63	100.5	70.95	105.26	105.02	72.56	0.705058	0.70597	0.689341	0.690916
62	16	1	100.37	101.55	74.13	112.16	111.79	78.91	0.738567	0.729985	0.703549	0.705877
63	16	1	109.84	110.16	77.32	114.98	115.61	79.13	0.703933	0.701888	0.688207	0.684456
64	17	1	100.9	101.07	69.08	106.63	106.96	73.75	0.684638	0.683487	0.691644	0.68951
65	16	1	109.31	109.98	79.88	115.28	116.62	84.81	0.730766	0.726314	0.735687	0.727234
66	23	1	95.87	96.47	67.94	104.24	103.25	75.35	0.708668	0.70426	0.722851	0.729782
67	18	1	99.16	98.58	65.93	106.76	107.03	69.86	0.664885	0.668797	0.654365	0.652714
68	18	1	108.13	108.1	78.01	118.99	118.43	82.2	0.721446	0.721647	0.690814	0.694081
69	17	1	97.66	97.52	67.63	107.07	107.1	73.82	0.692505	0.693499	0.689455	0.689262
70	19	2	89.51	89.88	63	97.61	97.51	68.81	0.703832	0.700935	0.704948	0.705671
71	19	2	82.46	82.67	57.79	88.9	90.57	59.99	0.700825	0.699044	0.674803	0.662361
72	19	2	87.61	87.76	59.74	93.97	93.99	65.03	0.681886	0.68072	0.692029	0.691882
73	18	2	83.82	84.02	60.61	90.11	90.47	61.5	0.723097	0.721376	0.682499	0.679783
74	18	2	90.5	90.87	62.86	94.65	94.46	65.86	0.694586	0.691757	0.695827	0.697226
75	18	2	91.21	91.89	64.27	97.29	99.47	69.07	0.704638	0.699423	0.709939	0.69438
76	18	2	93.13	93.17	66.79	97.8	97.55	69.81	0.71717	0.716862	0.713804	0.715633
77	18	2	105.01	105.42	73.93	114.42	112.44	77.13	0.704028	0.70129	0.674095	0.685966
78	18	2	89.51	88.85	62.46	94.9	93.4	63.28	0.697799	0.702983	0.666807	0.677516
79	20	2	87.15	88.82	64.32	94.26	93.02	64.55	0.738038	0.724161	0.684808	0.693937
80	20	2	93.86	93.05	66.22	97.58	97.87	67.85	0.705519	0.71166	0.695327	0.693267
81	18	2	87.43	87.24	61.78	97.29	97.11	66.72	0.706622	0.708161	0.685785	0.687056
82	18	2	92.05	92.66	66.07	98.44	99.58	70.55	0.717762	0.713037	0.71668	0.708476
83	19	2	86.36	86.79	61.97	91.74	92.82	61.51	0.717578	0.714022	0.670482	0.66268
84	20	1	98	98.9	68.73	101.66	101.06	68.23	0.701327	0.694944	0.671159	0.675143
85	21	1	101.45	102.3	75.32	106.72	108.7	76.2	0.742435	0.736266	0.714018	0.701012
86	22	1	95.78	96.47	68.63	102.1	102.85	72.7	0.716538	0.711413	0.712047	0.706855
87	20	1	102.48	103.78	75.78	109.8	108.33	77.39	0.739461	0.730198	0.704827	0.714391
88	22	1	87.9	87.64	71	105.33	105.98	76.04	0.807736	0.810132	0.721922	0.717494
89	19	1	96.87	97.65	68.55	103.65	103.78	71.51	0.707649	0.701997	0.689918	0.689054
90	21	1	100.35	101.1	73.89	107.33	109.57	74.57	0.736323	0.730861	0.694773	0.680569
91	20	1	110.36	111.53	79.47	119.05	118.07	81.75	0.720098	0.712544	0.686686	0.692386
92	20	1	111.85	112.18	80.61	119.05	119.6	85.88	0.720697	0.718577	0.721378	0.71806
93	21	1	101.31	101.57	69.55	106.01	106.6	73.57	0.686507	0.684749	0.693991	0.69015
94	20	1	108.22	109.24	75.72	116.89	118.13	80.99	0.699686	0.693153	0.692874	0.685601
95	21	1	104.89	105.45	71.27	113.95	115.49	80.82	0.679474	0.675865	0.709258	0.699801
96	17	1	106.04	107.81	73.05	114.33	114	79.42	0.688891	0.677581	0.694656	0.696667
97	17	1	103.99	105.13	77.7	107.61	107.81	78.2	0.747187	0.739085	0.726698	0.72535
98	19	1	95.07	94.77	66.67	105.93	104.8	71.5	0.701273	0.703493	0.674974	0.682252
99	21	1	102.29	102.3	72.67	107.65	106.69	74.46	0.710431	0.710362	0.691686	0.69791
100	18	1	103.63	104.14	75.87	111.45	110.42	78.79	0.732124	0.728539	0.706954	0.713548
101	22	2	87.38	88.3	62.47	91.78	91.57	63.49	0.714923	0.707475	0.691763	0.693349
102	23	2	89.82	89.95	64.62	95.63	96.12	67.09	0.719439	0.718399	0.701558	0.697982
103	22	2	95.88	96	71.33	104.37	104.67	76.26	0.743951	0.743021	0.73067	0.728576
104	22	2	90.69	90.21	63.77	94.91	93.5	64.59	0.703165	0.706906	0.680539	0.690802
105	21	2	95.66	97.31	67.07	99.23	99.86	68.41	0.701129	0.689241	0.689408	0.685059
106	21	2	90.22	90.31	66.16	95.34	94.56	67.28	0.733319	0.732588	0.705685	0.711506
107	21	2	92.57	92.43	70	99.06	99.28	70.96	0.756185	0.75733	0.716334	0.714746
108	18	2	91.08	92.83	67.05	100.53	99.93	68.44	0.736166	0.722288	0.680792	0.684879
109	20	2	93	93.28	67.16	96.53	95.66	65.03	0.722151	0.719983	0.673677	0.679803
110	20	2	94.84	95.78	65.6	104.51	104.05	70.13	0.691691	0.684903	0.671036	0.674003
111	20	2	87.53	88.59	63.51	92.72	93.85	65.79	0.72558	0.716898	0.709556	0.701012
112	19	2	91.36	90.36	64.83	97.48	98.47	68.69	0.70961	0.717463	0.704657	0.697573
113	20	2	93.07	94.22	70.32	100.55	100.89	68.14	0.75556	0.746338	0.677673	0.675389
114	20	2	88.58	88.74	64.4	93.64	93.38	63.18	0.727026	0.725716	0.674712	0.67659
115	21	2	94.99	96.22	68.56	100.65	104.53	71.31	0.72176	0.712534	0.708495	0.682196
116	21	2	84.08	85.74	62.36	88.81	89.42	64.43	0.741675	0.727315	0.725481	0.720532
117	21	2	91.36	93.05	69.35	99.75	101.33	70.28	0.759085	0.745298	0.704561	0.693575
118	20	2	87.37	88.16	59.19	92.16	93.35	63.61	0.677464	0.671393	0.690213	0.681414
119	22	2	86.64	87.21	62.13	93.41	95.22	68.29	0.717105	0.712418	0.731078	0.717181
120	20	2	84.41	86	61.55	92.86	92.74	64.44	0.729179	0.715698	0.693948	0.694846
121	21	2	85.56	86.17	57.04	90.8	90.77	59.19	0.666667	0.661947	0.651872	0.652088
122	21	2	91.9	92.08	64.54	92.77	92.53	63.14	0.702285	0.700912	0.680608	0.682373
123	20	2	91.38	93	67.77	99.85	100.47	70.56	0.741628	0.72871	0.70666	0.702299
124	20	2	89.39	90.1	63.81	95.24	96.72	65.56	0.713838	0.708213	0.688366	0.677833
125	21	2	93.38	95.02	68.38	102.87	103.62	71.94	0.732277	0.719638	0.699329	0.694268
126	22	2	91.66	93.85	64.43	98.74	98.64	68.29	0.702924	0.686521	0.691614	0.692315
127	20	1	99.6	98.9	71.99	103.81	103.19	73.04	0.722791	0.727907	0.703593	0.707821
128	20	1	102.8	102.51	70.78	112.36	110.75	78.78	0.688521	0.690469	0.701139	0.711332
129	24	1	103.64	104.94	67.96	109.26	108.74	70.95	0.655731	0.647608	0.649368	0.652474
130	20	1	102.52	102.67	74.29	109.26	108.74	70.95	0.724639	0.72358	0.649368	0.652474
131	22	1	97.62	98.13	67.58	103.72	102.87	69.68	0.692276	0.688678	0.671809	0.67736
132	20	1	97.79	98.06	67.09	102.64	103.22	70.93	0.686062	0.684173	0.691056	0.687173
133	22	1	101.55	101.69	72.14	109.71	110.81	79.29	0.710389	0.709411	0.722724	0.715549
134	21	1	107.15	106.82	75.83	114.88	115.83	78.29	0.707699	0.709886	0.681494	0.675904
135	22	1	104.14	104.24	73	110.35	108.98	75.74	0.700979	0.700307	0.686362	0.69499
136	22	1	96.69	97.07	70.79	106.1	105.95	76.16	0.732134	0.729268	0.717813	0.71883
137	24	1	98.18	100	69.96	105.98	105.87	75.05	0.712569	0.6996	0.708152	0.708888
138	23	1	95.92	98	71.71	106.94	106.75	73.84	0.747602	0.731735	0.690481	0.69171
139	22	1	99.79	100.69	71.7	106.12	106.11	72.99	0.718509	0.712087	0.687806	0.687871
140	22	1	92.46	93.51	64.1	99.26	99.02	67.15	0.693273	0.685488	0.676506	0.678146
141	21	1	95.19	96.03	65.55	103.82	104.8	73.55	0.688623	0.682599	0.708438	0.701813
142	20	1	102.97	102.9	71.58	109.83	111.52	74.88	0.695154	0.695627	0.681781	0.671449
143	20	1	103.06	103.33	74.57	112.84	112.3	81.67	0.723559	0.721668	0.723768	0.727248
144	20	1	100.68	102.68	74.57	110.24	111	79.79	0.740663	0.726237	0.723784	0.718829
145	20	2	93.53	93.56	68.15	99.3	98.18	69.79	0.728643	0.72841	0.70282	0.710837
146	20	2	81.37	82.67	56.91	89.06	90.64	59.5	0.699398	0.6884	0.668089	0.656443
147	20	2	93.84	95.15	67.1	99.06	99.45	68.17	0.715047	0.705202	0.688169	0.68547
148	20	2	96.78	96.14	67.99	100.29	100.13	70.41	0.702521	0.707198	0.702064	0.703186
149	21	2	96.45	97.42	67.46	102.57	102.5	70.45	0.69943	0.692466	0.686848	0.687317
150	21	2	85.56	86.32	64.21	92.6	92.55	65.91	0.750468	0.74386	0.711771	0.712156
151	20	2	96.91	96.73	73.32	102.35	102.96	76.39	0.756578	0.757986	0.746361	0.741939
152	21	2	92.51	93.98	68.82	98.48	99.71	69.77	0.74392	0.732283	0.708469	0.699729
153	21	2	98.88	100.02	69.02	107.44	108.27	73.81	0.698018	0.690062	0.686988	0.681722
154	21	2	92.43	93.82	68.9	98.55	98.83	68.48	0.745429	0.734385	0.694876	0.692907
155	21	2	97.71	98.37	69.61	103.22	104.18	74.04	0.712414	0.707634	0.717303	0.710693
156	22	2	90.42	91.75	65.88	96.52	95.94	68.58	0.7286	0.718038	0.710526	0.714822
157	21	2	103.4	104.68	75.45	107.26	107.48	77.24	0.729691	0.720768	0.720119	0.718645
158	21	2	102.98	104	75.45	107.26	107.48	77.24	0.732667	0.725481	0.720119	0.718645
159	22	2	95.44	94.25	64.86	100.14	99.57	69.14	0.679589	0.68817	0.690433	0.694386
160	21	2	95.59	94.94	71.59	100.22	100.14	72.92	0.748928	0.754055	0.727599	0.728181
161	21	2	94.52	96.14	69.39	101.89	102.26	70.19	0.73413	0.72176	0.68888	0.686388
162	22	2	92.62	91.98	68.49	97.85	99.12	69.21	0.739473	0.744618	0.707307	0.698245
163	20	2	94.15	95.02	71.01	101.83	102.14	73.17	0.754222	0.747316	0.718551	0.71637
164	20	2	93.24	93.8	64.8	104.45	105.08	73.53	0.694981	0.690832	0.703973	0.699753
165	21	2	91.63	92.06	69.32	93.78	95.85	67.82	0.756521	0.752987	0.723182	0.707564
166	21	2	104.17	106.16	74	115.97	115.11	81.14	0.710377	0.697061	0.699664	0.704891
167	17	2	88.24	87.7	63.49	94.11	94.54	68.19	0.719515	0.723945	0.724578	0.721282
168	17	2	94.04	94.34	69.94	102	100.85	70.41	0.743726	0.741361	0.690294	0.698166
169	18	2	93.87	92.31	65.87	96.89	97.67	67.15	0.701715	0.713574	0.693054	0.687519
170	18	2	93.32	92.31	66.83	104.04	104.22	71.88	0.716138	0.723974	0.690888	0.689695
171	18	1	111.43	110.88	79.31	119.69	118.15	82.09	0.711747	0.715278	0.685855	0.694795
172	18	1	98.09	98.1	73.33	104.8	105.71	74.53	0.747579	0.747503	0.711164	0.705042
173	18	2	96.11	96.88	68.45	106.52	105.08	72.19	0.712205	0.706544	0.677713	0.687
174	19	2	90.35	91.95	64.26	95.75	96.07	65.13	0.711234	0.698858	0.680209	0.677943
175	18	2	93.77	94.12	66.71	102.35	101.98	70.13	0.711422	0.708776	0.685198	0.687684
176	20	2	89.77	89.48	64.87	94.86	95.14	67.63	0.722624	0.724966	0.712945	0.710847
177	18	2	101.94	104.6	71.95	108.48	108.85	73.86	0.705807	0.687859	0.680863	0.678548
178	18	2	97.48	98.99	68.09	101.48	101.87	68.58	0.698502	0.687847	0.675798	0.673211
179	18	2	89.14	90.68	63.2	95.46	97.54	66.79	0.708997	0.696956	0.699665	0.684745
180	19	2	96.14	97.49	71.49	101.7	100.8	70.31	0.743603	0.733306	0.691347	0.69752
181	19	2	89.25	88.86	64.11	96.44	95.97	66.61	0.718319	0.721472	0.690689	0.694071
182	20	1	101.86	102.32	68.11	113.95	113.17	77.15	0.668663	0.665657	0.677051	0.681718
183	18	1	107.8	106.85	77.86	114.01	114.44	79.14	0.722263	0.728685	0.69415	0.691541
184	18	1	94.63	94.83	64.87	99.28	100.01	67.49	0.685512	0.684066	0.679795	0.674833
185	19	1	101.67	101.97	72.66	105.83	104.75	72.03	0.714665	0.712563	0.68062	0.687637
186	17	1	92.37	93.36	64.99	99.91	100.74	68.4	0.703583	0.696123	0.684616	0.678976
187	17	1	105.6	104.32	75.71	112.48	113.11	78.9	0.716951	0.725748	0.701458	0.697551
188	18	1	108.48	108.51	74.44	115.3	116.27	80.26	0.686209	0.68602	0.696097	0.69029
189	17	1	98.55	96.59	70	102.67	103.68	73.22	0.710299	0.724713	0.713159	0.706211
190	18	1	99.93	99.01	71.39	106.59	107.76	75.55	0.7144	0.721038	0.708791	0.701095
191	19	1	99.84	98.77	69.24	104.47	104.09	73.05	0.69351	0.701023	0.699244	0.701797
192	17	1	104.13	103.85	73.49	106.22	106.5	75.21	0.705752	0.707655	0.708059	0.706197
193	19	1	107.87	106.66	72.91	111.28	112.51	75.28	0.675906	0.683574	0.676492	0.669096
194	22	1	95.28	95.77	65	111.28	112.51	75.28	0.6822	0.678709	0.676492	0.669096
195	21	1	100.28	101.44	71.94	110.45	110.29	76.62	0.717391	0.709188	0.693708	0.694714
196	18	1	94.99	94.65	65.97	104.67	104.76	72.34	0.694494	0.696989	0.691124	0.690531
197	17	1	93.8	92.07	61.45	112.84	110.71	75.74	0.655117	0.667427	0.671216	0.68413
198	17	1	105.66	105.59	76.05	110.28	110.94	78.82	0.719761	0.720239	0.714726	0.710474
199	17	1	98.17	98.5	70.53	104.09	105.44	74.18	0.718448	0.716041	0.712653	0.703528
200	18	1	99.8	100.07	68.24	105.63	107.09	73.54	0.683768	0.681923	0.696204	0.686712
